# Supplementary material
Source: MDPI journal article supplement (https://www.mdpi.com/search?q=forests-09-00317)
Supplement: s001 [file forests-09-00317-s001.pdf]

## Description of the land and water phases of the SWAT model

Land or terrestrial phase: At this stage, the model calculates the amount of water, sediments and nutrient concentrations that are discharged to the main stream from each sub-basin. The necessary inputs are: daily precipitation data for at least the last 5 years, land use/cover, soil types, digital elevation model and a hydrological network for flat terrain.

The hydrological cycle is simulated by SWAT based on the equation of the water balance:

$$SW_t = SW_o + (R_{day} + Q_{surf} - E_a - W_{seep} - Q_{gw}), \quad (1)$$

Where  $SW_t$  is the final content of water in the soil (mm H<sub>2</sub>O),  $SW_o$  is the initial content of water and soil at day  $i$  (mm H<sub>2</sub>O),  $t$  is the time (days),  $R_{day}$  is the amount of precipitation in a Day  $i$  (mm H<sub>2</sub>O),  $Q_{surf}$  is the amount of surface runoff in a day  $i$  (mm H<sub>2</sub>O),  $E_a$  is the amount of evapotranspiration in a day  $i$  (mm H<sub>2</sub>O),  $W_{seep}$  is the amount of water entering the vadose zone in a Soil profile in one day  $i$  (mm H<sub>2</sub>O), and  $Q_{gw}$  is the amount of return flow in one day  $i$  (mm H<sub>2</sub>O).

The subdivision of the basin allows the model to reflect differences in evapotranspiration for various crops and soils. Runoff is estimated separately for each HRU and set in route to obtain total runoff from the basin. This increases accuracy and gives a better physical description of the water balance. The volume of surface runoff is calculated using a modification of the Curve Number SCS (USDA Soil Conservation Service) or the Green & Ampt infiltration method. In the curve number, the curves vary non-linearly with the soil moisture content. The Green & Ampt method requires daily precipitation data and calculates infiltration as a potential matrix function and effective hydraulic conductivity. Thus, water that fails to infiltrate becomes surface runoff. Erosion and sediments are estimated for each HRU with the modified universal soil loss equation or modified universal soil loss equation (MUSLE). MUSLE uses the amount of runoff to simulate erosion and sediment. This results in a number of benefits: accurate prediction of the model is increased and estimation of sediments from a single storm can be calculated. The hydrological model provides estimates of runoff volume and maximum runoff rates, which are used to calculate the erosive energy variable of the runoff with the sub-basin area. The crop management factor is recalculated each day the runoff occurs.

Water phase: This phase includes the movement of water, sediments, etc. through the network of channels until it leaves the basin at the outlet. Displacement in the main channel can be divided into water and sediment components:

*Water:* With water flowing downstream, a portion may be lost due to evaporation and transmission through the channel bed. Another potential loss is due to the removal of water from the channel for agricultural or human use. The flow can be supplemented by rain falling directly on the channel and from point sources. The flow is directed through the channel using a variable method of storage coefficients.

*Sediments:* The transport of sediments in the channel is controlled by the simultaneous operation of two processes: deposition and degradation. SWAT uses simplified equations and the maximum amount of sediment that can be transported from a segment is a function of the maximum velocity of runoff.

**Table S1.** Hydrometric stations used in each watershed – weblinks to access the data online

| Unit  | USGS Code | Station Name                      | Elev. | Years of record | Weblink – Entire Time Series                                                                                                                                                                                                                                                                                                                                                                                                                                                                                                                      | Weblink – Time Series used in this study                                                                                                                                                                                                                                                                                                                                                            |
|-------|-----------|-----------------------------------|-------|-----------------|---------------------------------------------------------------------------------------------------------------------------------------------------------------------------------------------------------------------------------------------------------------------------------------------------------------------------------------------------------------------------------------------------------------------------------------------------------------------------------------------------------------------------------------------------|-----------------------------------------------------------------------------------------------------------------------------------------------------------------------------------------------------------------------------------------------------------------------------------------------------------------------------------------------------------------------------------------------------|
| Wat01 | 09289500  | Lake Fork River, UT               | 2493  | 1933-2017       | <a href="https://waterdata.usgs.gov/ut/nwis/dv/?site_no=09289500&amp;agency_cd=USGS&amp;referred_module=sw">https://waterdata.usgs.gov/ut/nwis/dv/?site_no=09289500&amp;agency_cd=USGS&amp;referred_module=sw</a>                                                                                                                                                                                                                                                                                                                                 | <a href="https://waterdata.usgs.gov/ut/nwis/dv?cb_00060=on&amp;format=rdb&amp;site_no=09289500&amp;referred_module=sw&amp;period=&amp;begin_date=1990-01-01&amp;end_date=2011-12-31">https://waterdata.usgs.gov/ut/nwis/dv?cb_00060=on&amp;format=rdb&amp;site_no=09289500&amp;referred_module=sw&amp;period=&amp;begin_date=1990-01-01&amp;end_date=2011-12-31</a>                                 |
| Wat02 | 10249300  | South Twin River, NV              | 1950  | 1965-2017       | <a href="https://waterdata.usgs.gov/nv/nwis/dv/?site_no=10249300&amp;agency_cd=USGS&amp;referred_module=sw">https://waterdata.usgs.gov/nv/nwis/dv/?site_no=10249300&amp;agency_cd=USGS&amp;referred_module=sw</a>                                                                                                                                                                                                                                                                                                                                 | <a href="https://waterdata.usgs.gov/nv/nwis/dv?cb_00010=on&amp;cb_00060=on&amp;format=rdb&amp;site_no=10249300&amp;referred_module=sw&amp;period=&amp;begin_date=1990-01-01&amp;end_date=2011-12-31">https://waterdata.usgs.gov/nv/nwis/dv?cb_00010=on&amp;cb_00060=on&amp;format=rdb&amp;site_no=10249300&amp;referred_module=sw&amp;period=&amp;begin_date=1990-01-01&amp;end_date=2011-12-31</a> |
| Wat03 | 12359800  | South Flathead River, MT          | 1089  | 1965-2017       | <a href="https://waterdata.usgs.gov/mt/nwis/dv/?site_no=12359800&amp;agency_cd=USGS&amp;referred_module=sw">https://waterdata.usgs.gov/mt/nwis/dv/?site_no=12359800&amp;agency_cd=USGS&amp;referred_module=sw</a>                                                                                                                                                                                                                                                                                                                                 | <a href="https://waterdata.usgs.gov/mt/nwis/dv?cb_00060=on&amp;format=rdb&amp;site_no=12359800&amp;referred_module=sw&amp;period=&amp;begin_date=1990-01-01&amp;end_date=2011-12-31">https://waterdata.usgs.gov/mt/nwis/dv?cb_00060=on&amp;format=rdb&amp;site_no=12359800&amp;referred_module=sw&amp;period=&amp;begin_date=1990-01-01&amp;end_date=2011-12-31</a>                                 |
| Wat04 | 13310700  | Salmon River Station, ID          | 1143  | 1966-2017       | <a href="https://waterdata.usgs.gov/nwis/dv/?site_no=13310700&amp;agency_cd=USGS&amp;referred_module=sw">https://waterdata.usgs.gov/nwis/dv/?site_no=13310700&amp;agency_cd=USGS&amp;referred_module=sw</a>                                                                                                                                                                                                                                                                                                                                       | <a href="https://waterdata.usgs.gov/nwis/dv?cb_00060=on&amp;format=rdb&amp;site_no=13310700&amp;referred_module=sw&amp;period=&amp;begin_date=1990-01-01&amp;end_date=2011-12-31">https://waterdata.usgs.gov/nwis/dv?cb_00060=on&amp;format=rdb&amp;site_no=13310700&amp;referred_module=sw&amp;period=&amp;begin_date=1990-01-01&amp;end_date=2011-12-31</a>                                       |
| Wat05 | 13336500  | Selway River Lowell, ID           | 469   | 1911-2017       | <a href="https://waterdata.usgs.gov/id/nwis/dv/?site_no=13336500&amp;agency_cd=USGS&amp;referred_module=sw">https://waterdata.usgs.gov/id/nwis/dv/?site_no=13336500&amp;agency_cd=USGS&amp;referred_module=sw</a>                                                                                                                                                                                                                                                                                                                                 | <a href="https://waterdata.usgs.gov/id/nwis/dv?cb_00060=on&amp;format=rdb&amp;site_no=13336500&amp;referred_module=sw&amp;period=&amp;begin_date=1990-01-01&amp;end_date=2011-12-31">https://waterdata.usgs.gov/id/nwis/dv?cb_00060=on&amp;format=rdb&amp;site_no=13336500&amp;referred_module=sw&amp;period=&amp;begin_date=1990-01-01&amp;end_date=2011-12-31</a>                                 |
| Wat06 | 13340600  | Clearwater River, ID              | 505   | 1967-2017       | <a href="https://waterdata.usgs.gov/nwis/dv/?site_no=13340600&amp;agency_cd=USGS&amp;referred_module=sw">https://waterdata.usgs.gov/nwis/dv/?site_no=13340600&amp;agency_cd=USGS&amp;referred_module=sw</a>                                                                                                                                                                                                                                                                                                                                       | <a href="https://waterdata.usgs.gov/nwis/dv?cb_00060=on&amp;format=rdb&amp;site_no=13340600&amp;referred_module=sw&amp;period=&amp;begin_date=1990-01-01&amp;end_date=2011-12-31">https://waterdata.usgs.gov/nwis/dv?cb_00060=on&amp;format=rdb&amp;site_no=13340600&amp;referred_module=sw&amp;period=&amp;begin_date=1990-01-01&amp;end_date=2011-12-31</a>                                       |
| Wat07 | 9277800   | Rock Creek above South Fork, Utah | 2428  | 1965-1994       | <a href="https://waterdata.usgs.gov/nwis/dv/?site_no=09277800&amp;agency_cd=USGS&amp;referred_module=sw">https://waterdata.usgs.gov/nwis/dv/?site_no=09277800&amp;agency_cd=USGS&amp;referred_module=sw</a>                                                                                                                                                                                                                                                                                                                                       | <a href="https://waterdata.usgs.gov/nwis/dv?cb_00060=on&amp;format=rdb&amp;site_no=09277800&amp;referred_module=sw&amp;period=&amp;begin_date=1990-01-01&amp;end_date=1995-12-31">https://waterdata.usgs.gov/nwis/dv?cb_00060=on&amp;format=rdb&amp;site_no=09277800&amp;referred_module=sw&amp;period=&amp;begin_date=1990-01-01&amp;end_date=1995-12-31</a>                                       |
| Wat10 | 10153800  | North Fork Provo River, UT        | 2280  | 1963-1996       | <a href="https://waterdata.usgs.gov/nwis/dv/?site_no=10153800&amp;agency_cd=USGS&amp;referred_module=sw">https://waterdata.usgs.gov/nwis/dv/?site_no=10153800&amp;agency_cd=USGS&amp;referred_module=sw</a>                                                                                                                                                                                                                                                                                                                                       | <a href="https://waterdata.usgs.gov/nwis/dv?cb_00060=on&amp;format=rdb&amp;site_no=10153800&amp;referred_module=sw&amp;period=&amp;begin_date=1990-01-01&amp;end_date=1997-12-31">https://waterdata.usgs.gov/nwis/dv?cb_00060=on&amp;format=rdb&amp;site_no=10153800&amp;referred_module=sw&amp;period=&amp;begin_date=1990-01-01&amp;end_date=1997-12-31</a>                                       |
| Wat13 | 13335690  | Selway River, ID                  | 667   | 1995-2006       | <a href="https://waterdata.usgs.gov/nwis/dv?referred_module=sw&amp;huc2_cd=17060301&amp;index_pmcode_00065=3&amp;index_pmcode_00060=4&amp;index_pmcode_00062=5&amp;index_pmcode_72020=6&amp;sort_key=site_no&amp;group_key=county_cd&amp;sitefile_output_format=html_table">https://waterdata.usgs.gov/nwis/dv?referred_module=sw&amp;huc2_cd=17060301&amp;index_pmcode_00065=3&amp;index_pmcode_00060=4&amp;index_pmcode_00062=5&amp;index_pmcode_72020=6&amp;sort_key=site_no&amp;group_key=county_cd&amp;sitefile_output_format=html_table</a> | <a href="https://waterdata.usgs.gov/nwis/dv?cb_00060=on&amp;format=rdb&amp;site_no=13335690&amp;referred_module=sw&amp;period=&amp;begin_date=1990-01-01&amp;end_date=2007-12-31">https://waterdata.usgs.gov/nwis/dv?cb_00060=on&amp;format=rdb&amp;site_no=13335690&amp;referred_module=sw&amp;period=&amp;begin_date=1990-01-01&amp;end_date=2007-12-31</a>                                       |
| Wat14 | 13335700  | Moose Creek Ranger St. ID         | 667   | 1995-2005       | <a href="https://waterdata.usgs.gov/nwis/dv/?site_no=13335700&amp;agency_cd=USGS&amp;referred_module=sw">https://waterdata.usgs.gov/nwis/dv/?site_no=13335700&amp;agency_cd=USGS&amp;referred_module=sw</a>                                                                                                                                                                                                                                                                                                                                       | <a href="https://waterdata.usgs.gov/nwis/dv?cb_00010=on&amp;cb_00060=on&amp;format=rdb&amp;site_no=13335700&amp;referred_module=sw&amp;period=&amp;begin_date=1995-01-01&amp;end_date=2007-12-31">https://waterdata.usgs.gov/nwis/dv?cb_00010=on&amp;cb_00060=on&amp;format=rdb&amp;site_no=13335700&amp;referred_module=sw&amp;period=&amp;begin_date=1995-01-01&amp;end_date=2007-12-31</a>       |

**Table S2.** Climatic information used for each watershed – weblinks to access the data online

| Unit  | HUC-12 Name, Code, State                  | HUC-08Name and Code08                  | Coverage (%) |         | Weblink                                                                                                                                                                     |
|-------|-------------------------------------------|----------------------------------------|--------------|---------|-----------------------------------------------------------------------------------------------------------------------------------------------------------------------------|
|       |                                           |                                        | Temp.        | Precip. |                                                                                                                                                                             |
| Wat01 | North Fork Provo River, UT - 160202030103 | Provo River                            | 100          | 100     | <a href="https://www.ncdc.noaa.gov/cdo-web/datasets/GHCND/locations/HUC:16020203/detail">https://www.ncdc.noaa.gov/cdo-web/datasets/GHCND/locations/HUC:16020203/detail</a> |
| Wat02 | South Twin River, NV – 160600040701       | Norther Big Smoky Valley - 16060004    | 99           | 97      | <a href="https://www.ncdc.noaa.gov/cdo-web/datasets/GHCND/locations/HUC:16060004/detail">https://www.ncdc.noaa.gov/cdo-web/datasets/GHCND/locations/HUC:16060004/detail</a> |
| Wat03 | Multiple: HUC-12 units, MT                | South Fork Flathead - 17010209         | 100          | 100     | <a href="https://www.ncdc.noaa.gov/cdo-web/datasets/GHCND/locations/HUC:17010209/detail">https://www.ncdc.noaa.gov/cdo-web/datasets/GHCND/locations/HUC:17010209/detail</a> |
| Wat04 | Multiple: HUC-12 units, ID                | South Fork Salmon - 17060208           | 99           | 100     | <a href="https://www.ncdc.noaa.gov/cdo-web/datasets/GHCND/locations/HUC:17060208/detail">https://www.ncdc.noaa.gov/cdo-web/datasets/GHCND/locations/HUC:17060208/detail</a> |
| Wat05 | Multiple: HUC-12 units, ID                | Lower Selway - 17060302                | 99           | 100     | <a href="https://www.ncdc.noaa.gov/cdo-web/datasets/GHCND/locations/HUC:17060302/detail">https://www.ncdc.noaa.gov/cdo-web/datasets/GHCND/locations/HUC:17060302/detail</a> |
| Wat06 | Multiple: HUC-12 units, ID                | Upper North Fork Clearwater - 17060307 | 99           | 100     | <a href="https://www.ncdc.noaa.gov/cdo-web/datasets/GHCND/locations/HUC:17060307/detail">https://www.ncdc.noaa.gov/cdo-web/datasets/GHCND/locations/HUC:17060307/detail</a> |
| Wat07 | Multiple: HUC-12 units, UT                | Duchesne - 14060003                    | 100          | 100     | <a href="https://www.ncdc.noaa.gov/cdo-web/datasets/GHCND/locations/HUC:14060003/detail">https://www.ncdc.noaa.gov/cdo-web/datasets/GHCND/locations/HUC:14060003/detail</a> |
| Wat10 | Multiple: HUC-12 units, UT                | Duchesne - 14060003                    | 100          | 100     | <a href="https://www.ncdc.noaa.gov/cdo-web/datasets/GHCND/locations/HUC:14060003/detail">https://www.ncdc.noaa.gov/cdo-web/datasets/GHCND/locations/HUC:14060003/detail</a> |
| Wat13 | Multiple: HUC-12 units, ID                | Upper Selway - 17060301                | 98           | 98      | <a href="https://www.ncdc.noaa.gov/cdo-web/datasets/GHCND/locations/HUC:17060301/detail">https://www.ncdc.noaa.gov/cdo-web/datasets/GHCND/locations/HUC:17060301/detail</a> |
| Wat14 | Multiple: HUC-12 units, ID                | Lower Selway - 17060302                | 99           | 100     | <a href="https://www.ncdc.noaa.gov/cdo-web/datasets/GHCND/locations/HUC:17060302/detail">https://www.ncdc.noaa.gov/cdo-web/datasets/GHCND/locations/HUC:17060302/detail</a> |

**Table S3.** SWAT parameters and initial range of values used during calibration.

| <b>Parameter name</b> | <b>Range</b> | <b>Parameter name</b>    | <b>Range</b> |
|-----------------------|--------------|--------------------------|--------------|
| v__ALPHA_BF.gw        | 0            | 1 v__ESCO.bsn            | 0 1          |
| v__GW_DELAY.gw        | 0            | 100 v__CH_N2.rte         | 0 0.3        |
| v__GWQMN.gw           | 0            | 2 v__CANMX.hru           | 0 100        |
| v__SMTMP.bsn          | 0            | 5 v__CH_K2.rte           | 0 150        |
| v__SFTMP.bsn          | 0            | 5 v__GW_REVAP.gw         | 0.02 0.2     |
| v__SMFMX.bsn          | 0            | 10 r__SOL_Z().sol        | -0.5 0.5     |
| v__SMFMN.bsn          | 0            | 10 v__REVAPMN.gw         | 0 500        |
| v__TIMP.bsn           | 0.01         | 1 r__EPCO.bsn            | -0.5 0.5     |
| v__SURLAG.bsn         | 0            | 4 r__TLAPS.sub           | -0.5 0.5     |
| v__RCHRG_DP.gw        | 0            | 1 r__SLSUBBSN.hru        | -0.5 0.5     |
| r__SOL_AWC().sol      | -0.5         | 0.5 r__BLAI{8}.plant.dat | -0.5 0.5     |
| r__SOL_K().sol        | -0.5         | 0.5 v__BIOMIX.mgt        | 0 1          |
| r__CN2.mgt            | -0.1         | 0.1 v__SOL_ALB().sol     | 0 1          |

**Table S4.** Breakdown of disturbance by causal agents across all pilot watersheds

| Unit | Area (ha) | Disturbance Year | Area Disturbed | Fires (ha) | Harvest (ha) | Insects (ha) | Fires %     | Harvest %   | Insects %   |
|------|-----------|------------------|----------------|------------|--------------|--------------|-------------|-------------|-------------|
| 1    | 19851.48  | 2002             | 1.17           |            | 1.17         |              | 0           | 0.058441558 | 0           |
| 1    | 19851.48  | 2004             | 11.79          |            |              | 11.79        | 0           | 0           | 0.059391038 |
| 1    | 19851.48  | 2005             | 1.62           |            | 1.62         |              | 0           | 0.008160601 | 0           |
| 1    | 19851.48  | 2006             | 116.46         |            |              | 116.46       | 0           | 0           | 0.586656511 |
| 1    | 19851.48  | 2008             | 22.95          |            |              | 22.95        | 0           | 0           | 0.115608509 |
| 1    | 19851.48  | 2009             | 253.89         |            |              | 253.89       | 0           | 0           | 1.278947464 |
| 1    | 19851.48  | 2010             | 333            |            |              | 333          | 0           | 0           | 1.677456794 |
| 1    | 19851.48  | 2011             | 5665.23        |            |              | 5665.23      | 0           | 0           | 28.53807374 |
| 2    | 5021.55   | 2002             | 4.59           | 4.59       |              |              | 0.09140604  | 0           | 0           |
| 3    | 299949.39 | 1991             | 82.62          | 64.71      | 17.91        |              | 0.021573639 | 0.005971007 | 0           |
| 3    | 299949.39 | 1992             | 44.01          |            | 29.61        | 14.4         | 0           | 0.009871665 | 0.00480081  |
| 3    | 299949.39 | 1993             | 9              |            | 9            |              | 0           | 0.003000506 | 0           |
| 3    | 299949.39 | 1995             | 3066.21        | 3026.34    | 24.75        | 15.12        | 1.00895021  | 0.008251392 | 0.00504085  |
| 3    | 299949.39 | 1996             | 18.54          | 11.79      | 3.96         | 2.79         | 0.003930663 | 0.001320223 | 0.000930157 |
| 3    | 299949.39 | 1997             | 1.08           |            | 1.08         |              | 0           | 0.000360061 | 0           |
| 3    | 299949.39 | 1998             | 42.84          |            | 42.84        |              | 0           | 0.014282409 | 0           |
| 3    | 299949.39 | 1999             | 258.93         | 70.83      | 21.51        | 166.59       | 0.023613984 | 0.00717121  | 0.055539369 |
| 3    | 299949.39 | 2000             | 3550.95        | 3292.2     | 128.61       | 130.14       | 1.097585163 | 0.042877233 | 0.043387319 |
| 3    | 299949.39 | 2001             | 1623.51        | 1596.78    | 11.25        | 15.48        | 0.532349807 | 0.003750633 | 0.005160871 |
| 3    | 299949.39 | 2002             | 1706.4         | 1633.14    |              | 73.26        | 0.544471852 | 0           | 0.02442412  |
| 3    | 299949.39 | 2003             | 7761.96        | 7744.05    |              | 17.91        | 2.581785547 | 0           | 0.005971007 |
| 3    | 299949.39 | 2004             | 8215.92        | 8077.77    | 138.15       |              | 2.693044317 | 0.04605777  | 0           |
| 3    | 299949.39 | 2005             | 1187.37        | 1144.62    | 42.75        |              | 0.381604377 | 0.014252404 | 0           |
| 3    | 299949.39 | 2006             | 99.45          | 72.81      | 26.64        |              | 0.024274095 | 0.008881498 | 0           |

| Unit | Area (ha) | Disturbance Year | Area Disturbed | Fires (ha) | Harvest (ha) | Insects (ha) | Fires %     | Harvest %   | Insects %   |
|------|-----------|------------------|----------------|------------|--------------|--------------|-------------|-------------|-------------|
| 3    | 299949.39 | 2007             | 5569.83        | 5335.74    |              | 234.09       | 1.778880097 | 0           | 0.078043166 |
| 3    | 299949.39 | 2008             | 966.24         | 966.24     |              |              | 0.322134344 | 0           | 0           |
| 3    | 299949.39 | 2009             | 143.1          |            | 33.84        | 109.26       | 0           | 0.011281903 | 0.036426145 |
| 3    | 299949.39 | 2010             | 1084.05        | 1082.7     | 1.35         |              | 0.360960894 | 0.000450076 | 0           |
| 3    | 299949.39 | 2011             | 2031.12        | 1757.34    |              | 273.78       | 0.585878838 | 0           | 0.091275398 |
| 4    | 85283.28  | 1992             | 463.41         | 449.55     | 9.81         | 4.05         | 0.527125598 | 0.011502841 | 0.004748879 |
| 4    | 85283.28  | 1993             | 7.92           |            | 7.92         |              | 0           | 0.009286697 | 0           |
| 4    | 85283.28  | 1994             | 587.79         | 587.79     |              |              | 0.689220677 | 0           | 0           |
| 4    | 85283.28  | 1995             | 1277.28        | 1264.86    | 12.42        |              | 1.48312776  | 0.01456323  | 0           |
| 4    | 85283.28  | 1996             | 543.6          | 487.53     | 56.07        |              | 0.571659533 | 0.065745595 | 0           |
| 4    | 85283.28  | 1997             | 190.44         | 174.78     | 15.66        |              | 0.204940523 | 0.018362333 | 0           |
| 4    | 85283.28  | 1998             | 28.62          | 5.31       | 23.31        |              | 0.006226308 | 0.027332438 | 0           |
| 4    | 85283.28  | 1999             | 2.61           |            |              | 2.61         | 0           | 0           | 0.003060389 |
| 4    | 85283.28  | 2000             | 403.29         | 402.12     | 1.17         |              | 0.471510946 | 0.001371898 | 0           |
| 4    | 85283.28  | 2001             | 7.2            | 5.13       | 2.07         |              | 0.006015247 | 0.002427205 | 0           |
| 4    | 85283.28  | 2002             | 135            | 91.08      | 43.92        |              | 0.106797018 | 0.051498957 | 0           |
| 4    | 85283.28  | 2003             | 1310.22        | 1310.22    |              |              | 1.536315207 | 0           | 0           |
| 4    | 85283.28  | 2004             | 377.1          | 315.54     | 40.5         | 21.06        | 0.36999046  | 0.047488793 | 0.024694172 |
| 4    | 85283.28  | 2005             | 89.37          | 50.58      | 8.55         | 30.24        | 0.059308225 | 0.010025412 | 0.035458299 |
| 4    | 85283.28  | 2006             | 448.11         | 20.16      |              | 427.95       | 0.023638866 | 0           | 0.501798242 |
| 4    | 85283.28  | 2007             | 12979.17       | 12941.19   |              | 37.98        | 15.17435774 | 0           | 0.044533934 |
| 4    | 85283.28  | 2008             | 10763.1        | 10730.07   | 33.03        |              | 12.58168072 | 0.038729749 | 0           |
| 4    | 85283.28  | 2009             | 70.47          | 41.67      | 6.93         | 21.87        | 0.048860691 | 0.00812586  | 0.025643948 |
| 4    | 85283.28  | 2010             | 72.27          | 8.64       |              | 63.63        | 0.010130942 | 0           | 0.07461017  |
| 4    | 85283.28  | 2011             | 247.23         |            |              | 247.23       | 0           | 0           | 0.289892696 |
| 5    | 171407.43 | 1991             | 658.71         | 536.76     | 121.95       |              | 0.313148619 | 0.071146274 | 0           |

| Unit | Area (ha) | Disturbance Year | Area Disturbed | Fires (ha) | Harvest (ha) | Insects (ha) | Fires %     | Harvest %   | Insects %   |
|------|-----------|------------------|----------------|------------|--------------|--------------|-------------|-------------|-------------|
| 5    | 171407.43 | 1992             | 430.02         | 414.81     | 15.21        |              | 0.242002345 | 0.008873594 | 0           |
| 5    | 171407.43 | 1993             | 96.84          |            | 96.84        |              | 0           | 0.056496967 | 0           |
| 5    | 171407.43 | 1994             | 35.1           |            | 35.1         |              | 0           | 0.020477525 | 0           |
| 5    | 171407.43 | 1995             | 90.72          |            | 90.72        |              | 0           | 0.052926527 | 0           |
| 5    | 171407.43 | 1996             | 158.94         | 108.09     | 43.56        | 7.29         | 0.063060277 | 0.025413134 | 0.004253025 |
| 5    | 171407.43 | 1999             | 125.91         | 91.44      | 34.47        |              | 0.053346579 | 0.02010998  | 0           |
| 5    | 171407.43 | 2000             | 54.18          | 35.55      | 18.63        |              | 0.020740058 | 0.01086884  | 0           |
| 5    | 171407.43 | 2001             | 4.68           |            |              | 4.68         | 0           | 0           | 0.002730337 |
| 5    | 171407.43 | 2002             | 274.41         | 256.59     | 17.82        |              | 0.149695961 | 0.010396282 | 0           |
| 5    | 171407.43 | 2003             | 119.34         | 117.45     |              | 1.89         | 0.06852095  | 0           | 0.001102636 |
| 5    | 171407.43 | 2004             | 4267.8         | 4147.38    | 6.3          | 114.12       | 2.419603398 | 0.003675453 | 0.066578211 |
| 5    | 171407.43 | 2005             | 308.52         | 304.2      | 4.32         |              | 0.177471887 | 0.002520311 | 0           |
| 5    | 171407.43 | 2006             | 108.09         | 108.09     |              |              | 0.063060277 | 0           | 0           |
| 5    | 171407.43 | 2007             | 3882.06        | 3876.57    | 5.49         |              | 2.261611413 | 0.003202895 | 0           |
| 5    | 171407.43 | 2008             | 649.44         | 649.44     |              |              | 0.378886726 | 0           | 0           |
| 5    | 171407.43 | 2009             | 744.21         | 719.91     |              | 24.3         | 0.419999296 | 0           | 0.014176748 |
| 5    | 171407.43 | 2010             | 214.29         | 210.15     |              | 4.14         | 0.12260262  | 0           | 0.002415298 |
| 5    | 171407.43 | 2011             | 15.75          | 14.67      | 1.08         |              | 0.008558555 | 0.000630078 | 0           |
| 6    | 335489.76 | 1991             | 425.07         |            | 425.07       |              | 0           | 0.126701334 | 0           |
| 6    | 335489.76 | 1992             | 168.39         | 7.74       | 160.65       |              | 0.002307075 | 0.047885217 | 0           |
| 6    | 335489.76 | 1993             | 276.03         | 20.34      | 255.69       |              | 0.006062778 | 0.076213951 | 0           |
| 6    | 335489.76 | 1994             | 119.79         |            | 119.79       |              | 0           | 0.035706008 | 0           |
| 6    | 335489.76 | 1995             | 605.16         | 388.26     | 216.9        |              | 0.115729315 | 0.06465175  | 0           |
| 6    | 335489.76 | 1996             | 60.21          | 11.34      | 48.87        |              | 0.003380133 | 0.014566764 | 0           |
| 6    | 335489.76 | 1997             | 58.32          |            | 58.32        |              | 0           | 0.017383541 | 0           |
| 6    | 335489.76 | 1998             | 133.92         |            | 133.92       |              | 0           | 0.039917761 | 0           |

| Unit | Area (ha) | Disturbance Year | Area Disturbed | Fires (ha) | Harvest (ha) | Insects (ha) | Fires %     | Harvest %   | Insects %   |
|------|-----------|------------------|----------------|------------|--------------|--------------|-------------|-------------|-------------|
| 6    | 335489.76 | 1999             | 155.61         |            | 129.06       | 26.55        | 0           | 0.038469132 | 0.007913803 |
| 6    | 335489.76 | 2000             | 219.87         | 130.68     | 11.16        | 78.03        | 0.038952009 | 0.00332648  | 0.023258534 |
| 6    | 335489.76 | 2001             | 261.72         | 120.24     | 51.12        | 90.36        | 0.03584014  | 0.015237425 | 0.026933758 |
| 6    | 335489.76 | 2002             | 81.09          |            | 43.56        | 37.53        | 0           | 0.012984003 | 0.011186631 |
| 6    | 335489.76 | 2003             | 371.16         | 294.21     | 39.78        | 37.17        | 0.087695672 | 0.011857292 | 0.011079325 |
| 6    | 335489.76 | 2004             | 437.85         | 231.48     | 27.54        | 178.83       | 0.068997635 | 0.008208894 | 0.05330416  |
| 6    | 335489.76 | 2005             | 402.03         | 318.42     | 33.3         | 50.31        | 0.094911988 | 0.009925787 | 0.014995987 |
| 6    | 335489.76 | 2006             | 177.75         | 140.22     | 37.53        |              | 0.041795612 | 0.011186631 | 0           |
| 6    | 335489.76 | 2007             | 1890.54        | 1686.78    |              | 203.76       | 0.502781367 | 0           | 0.060735088 |
| 6    | 335489.76 | 2008             | 325.53         | 266.76     | 18.36        | 40.41        | 0.079513604 | 0.005472596 | 0.012045077 |
| 6    | 335489.76 | 2009             | 391.14         | 377.1      | 2.52         | 11.52        | 0.112402835 | 0.000751141 | 0.003433786 |
| 6    | 335489.76 | 2010             | 7.11           |            | 1.26         | 5.85         | 0           | 0.00037557  | 0.001743719 |
| 6    | 335489.76 | 2011             | 639.09         | 633.6      |              | 5.49         | 0.188858223 | 0           | 0.001636414 |
| 7    | 17728.02  | 2002             | 4.59           |            | 4.59         |              | 0           | 0.025891216 | 0           |
| 7    | 17728.02  | 2004             | 88.92          |            |              | 88.92        | 0           | 0           | 0.501578857 |
| 7    | 17728.02  | 2005             | 55.44          |            |              | 55.44        | 0           | 0           | 0.312725279 |
| 7    | 17728.02  | 2006             | 156.15         |            |              | 156.15       | 0           | 0           | 0.880809024 |
| 7    | 17728.02  | 2007             | 4.41           |            |              | 4.41         | 0           | 0           | 0.024875874 |
| 7    | 17728.02  | 2008             | 6.93           |            |              | 6.93         | 0           | 0           | 0.03909066  |
| 7    | 17728.02  | 2009             | 74.61          |            |              | 74.61        | 0           | 0           | 0.420859182 |
| 7    | 17728.02  | 2010             | 509.67         |            |              | 509.67       | 0           | 0           | 2.874940349 |
| 7    | 17728.02  | 2011             | 3214.53        |            |              | 3214.53      | 0           | 0           | 18.1324818  |
| 10   | 6280.2    | 2001             | 109.26         |            |              | 109.26       | 0           | 0           | 1.739753511 |
| 10   | 6280.2    | 2009             | 104.22         |            |              | 104.22       | 0           | 0           | 1.65950129  |
| 10   | 6280.2    | 2010             | 122.67         |            |              | 122.67       | 0           | 0           | 1.953281743 |
| 10   | 6280.2    | 2011             | 576.27         |            |              | 576.27       | 0           | 0           | 9.175981657 |



| Unit | Area (ha) | Disturbance Year | Area Disturbed | Fires (ha) | Harvest (ha) | Insects (ha) | Fires %     | Harvest %   | Insects %   |
|------|-----------|------------------|----------------|------------|--------------|--------------|-------------|-------------|-------------|
| 13   | 254950.2  | 1991             | 6.66           | 3.6        |              | 3.06         | 0.00141204  | 0           | 0.001200234 |
| 13   | 254950.2  | 1992             | 136.62         | 136.62     |              |              | 0.053586936 | 0           | 0           |
| 13   | 254950.2  | 1993             | 8.64           |            |              | 8.64         | 0           | 0           | 0.003388897 |
| 13   | 254950.2  | 1994             | 91.8           | 89.28      |              | 2.52         | 0.035018604 | 0           | 0.000988428 |
| 13   | 254950.2  | 1995             | 316.17         | 288.9      |              | 27.27        | 0.113316248 | 0           | 0.010696207 |
| 13   | 254950.2  | 1996             | 12326.94       | 12308.13   | 17.1         | 1.71         | 4.827660461 | 0.006707192 | 0.000670719 |
| 13   | 254950.2  | 1997             | 157.14         | 157.14     |              |              | 0.061635566 | 0           | 0           |
| 13   | 254950.2  | 1998             | 19.71          |            | 19.71        |              | 0           | 0.007730922 | 0           |
| 13   | 254950.2  | 1999             | 2827.17        | 2827.17    |              |              | 1.108910681 | 0           | 0           |
| 13   | 254950.2  | 2000             | 9542.97        | 9542.97    |              |              | 3.743072176 | 0           | 0           |
| 13   | 254950.2  | 2001             | 216.99         | 216.99     |              |              | 0.085110739 | 0           | 0           |
| 13   | 254950.2  | 2002             | 144.81         | 93.78      | 50.49        | 0.54         | 0.036783654 | 0.019803868 | 0.000211806 |
| 13   | 254950.2  | 2003             | 8.46           |            |              | 8.46         | 0           | 0           | 0.003318295 |
| 13   | 254950.2  | 2004             | 4100.13        | 3253.32    | 2.16         | 844.65       | 1.276060972 | 0.000847224 | 0.331299995 |
| 13   | 254950.2  | 2005             | 3958.56        | 3955.32    | 3.24         |              | 1.551408863 | 0.001270836 | 0           |
| 13   | 254950.2  | 2006             | 5561.19        | 5557.86    | 3.33         |              | 2.179978678 | 0.001306137 | 0           |
| 13   | 254950.2  | 2007             | 7369.47        | 7369.47    |              |              | 2.890552743 | 0           | 0           |
| 13   | 254950.2  | 2008             | 717.66         | 712.62     | 5.04         |              | 0.279513411 | 0.001976857 | 0           |
| 13   | 254950.2  | 2009             | 1191.33        | 1085.49    |              | 105.84       | 0.425765502 | 0           | 0.04151399  |
| 13   | 254950.2  | 2010             | 140.31         | 78.66      | 4.32         | 57.33        | 0.030853084 | 0.001694449 | 0.022486744 |
| 13   | 254950.2  | 2011             | 64.89          | 2.7        | 54           | 8.19         | 0.00105903  | 0.021180607 | 0.003212392 |
| 14   | 94003.65  | 1992             | 604.62         | 595.44     |              | 9.18         | 0.633422213 | 0           | 0.009765578 |
| 14   | 94003.65  | 1993             | 20.16          |            | 20.16        |              | 0           | 0.021445976 | 0           |
| 14   | 94003.65  | 1994             | 47.07          | 23.22      |              | 23.85        | 0.024701169 | 0           | 0.025371355 |
| 14   | 94003.65  | 1995             | 1361.52        | 1293.57    |              | 67.95        | 1.376084865 | 0           | 0.072284427 |
| 14   | 94003.65  | 1997             | 4.23           |            | 4.23         |              | 0           | 0.004499825 | 0           |

| Unit | Area (ha) | Disturbance Year | Area Disturbed | Fires (ha) | Harvest (ha) | Insects (ha) | Fires %     | Harvest %   | Insects % |
|------|-----------|------------------|----------------|------------|--------------|--------------|-------------|-------------|-----------|
| 14   | 94003.65  | 1999             | 44.55          | 44.55      |              |              | 0.047391777 | 0           | 0         |
| 14   | 94003.65  | 2000             | 238.77         | 238.77     |              |              | 0.254000776 | 0           | 0         |
| 14   | 94003.65  | 2001             | 20.52          | 20.52      |              |              | 0.02182894  | 0           | 0         |
| 14   | 94003.65  | 2002             | 918.36         | 861.93     | 56.43        |              | 0.916911205 | 0.060029584 | 0         |
| 14   | 94003.65  | 2004             | 1090.26        | 1081.98    | 8.28         |              | 1.15099786  | 0.008808169 | 0         |
| 14   | 94003.65  | 2005             | 388.08         | 388.08     |              |              | 0.412835034 | 0           | 0         |
| 14   | 94003.65  | 2006             | 100.44         | 100.44     |              |              | 0.106846915 | 0           | 0         |
| 14   | 94003.65  | 2007             | 2626.65        | 2626.65    |              |              | 2.794200012 | 0           | 0         |
| 14   | 94003.65  | 2008             | 134.46         | 134.46     |              |              | 0.143036999 | 0           | 0         |
| 14   | 94003.65  | 2009             | 747.09         | 747.09     |              |              | 0.794745736 | 0           | 0         |
| 14   | 94003.65  | 2010             | 38.79          | 30.78      | 8.01         |              | 0.032743409 | 0.008520946 | 0         |
| 14   | 94003.65  | 2011             | 56.43          | 56.43      |              |              | 0.060029584 | 0           | 0         |
